# Supplementary material for: Optimization of Mechanosensitive Cross-Talk between Matrix Stiffness and Protein Density: Independent Matrix Properties Regulate Spreading Dynamics of Myocytes
Source: MDPI journal article supplement (doi:10.3390/cells11132122), 2022-07-05
Supplement: s1 [file s1]

# SUPPLEMENTAL MATERIAL

## Optimization of Mechanosensitive Cross-talk between Matrix Stiffness and Protein Density: Independent Matrix Properties Regulate Spreading Dynamics of Myocytes

Judith Brock<sup>[1]</sup>, Julia Erhardt<sup>[1]</sup>, Stephan A. Eisler<sup>[2]</sup> and Hörning, Marcel<sup>[1,\*]</sup>

<sup>[1]</sup>*Biobased Materials Laboratory, Institute of Biomaterials and Biomolecular Systems, University of Stuttgart, 70569 Stuttgart, Germany*

<sup>[2]</sup>*Stuttgart Research Center Systems Biology (SRCSB), University of Stuttgart, 70569 Stuttgart, Germany*

<sup>[\*]</sup>*corresponding Author*

### Statistical analysis of fluorescent cells

Actin- and nuclei-stained cells that were recorded and statistically analysed as a  $5 \times 5$  tile composition. The average cell area  $\langle A \rangle$  and the average amount of actin per cell  $\langle M \rangle$  was calculated using AQuA, as

$$\langle A \rangle = \sum_{5 \times 5} A \times n_{\text{nuc}}^{-1}, \quad (\text{S1})$$

and

$$\langle M \rangle = \sum_{5 \times 5} M \times n_{\text{nuc}}^{-1} \quad (\text{S2})$$

where  $n_{\text{nuc}}$  is the number of nuclei per image-composition, and  $\langle M \rangle$  was obtained by AQuA. The fraction of actin amount to cell area for each image-composition was calculated, as

$$\langle R \rangle = \langle M \rangle \times \langle A \rangle^{-1}. \quad (\text{S3})$$

### Statistical analysis of phase-contrast cells

The statistical analysis of the projected cell areas was calculated by a log-transformation, because of the strongly skewed normal distributions, as

$$x_{\log}^i = \log(x^i), \quad (\text{S4})$$

the mean  $\mu_{\log}$  and standard deviation  $\sigma_{\log}$  was calculated, as

$$\mu_{\log} = \frac{1}{N} \sum_{i=1}^N x_{\log}^i \quad (\text{S5})$$

$$\sigma_{\log} = \sqrt{\frac{1}{N} \sum_{i=1}^N \left( x_{\log}^i - \mu_{\log} \right)^2}. \quad (\text{S6})$$

and back-transformed to obtain the mean and variance in the normal space as

$$\mu = e^{\mu_{\log} + \sigma_{\log}^2/2} \quad (\text{S7})$$

$$\sigma^2 = \mu^2 \left( e^{\sigma_{\log}^2} - 1 \right). \quad (\text{S8})$$

following the Finney estimator approach<sup>[1]</sup>, where  $N$  is the number of cells. Based on that the standard error with a 95% confidence interval is defined as

$$SE = \frac{2\sigma}{\sqrt{N}}. \quad (\text{S9})$$

As an alternative approach the projected cell area distribution was quantified as a mixture of two normal probability density functions (MN-pdf), which is defined by the fractional sum of two normal probability density functions, as

$$P_{\Sigma}(x|p, \mu_{1,2}, \sigma_{1,2}) = p \cdot P(x|\mu_1, \sigma_1) + (1 - p) \cdot P(x|\mu_2, \sigma_2), \quad (\text{S10})$$

with

$$P(x|\mu, \sigma) = \frac{1}{\sigma\sqrt{2\pi}} \exp\left(-\frac{(x - \mu)^2}{2\sigma^2}\right), \quad (\text{S11})$$

where  $p$  is the fractional parameter defined between zero and one. The means  $\mu_{1,2}$  and the respective standard error of the MN-pdf with a 95% confidence interval are defined as

$$SE_1 = \frac{2\sigma_1}{\sqrt{pN}} \quad \text{and} \quad SE_2 = \frac{2\sigma_2}{\sqrt{(1-p)N}}, \quad (\text{S12})$$

where  $N$  is the number of cells observed at a certain culture condition.

### Estimation of the protein equilibrium distance

For quantitative comparison the protein equilibrium distance (PED) of fibronectin (FN) was calculated as

$$\text{PED} = \sqrt{\frac{4\tilde{\rho}_{\text{FN}}}{\sqrt{3}}} \quad (\text{S13})$$

with the immobilized molecular surface density

$$\tilde{\rho}_{\text{FN}} = \rho_{\text{FN}} \times m^{-1} \times m_{\text{C}}^{-1} \times b_{\text{eff}} \quad (\text{S14})$$

where  $\rho_{\text{FN}}$  is the fibronectin coating density (see Table 2, main manuscript),  $m = 450$  kDa the molecular weight of FN,  $m_{\text{C}} = 1.66 \times 10^{-27}$  kg = 1 Da that is defined as 1/12 of the mass of a carbon-12 atom, and  $b_{\text{eff}} = 4 \times 6.8\%$  the binding efficiency of L-DOPA, which is about four times higher than the binding efficiency of SulfoSanpah[2,3].

### References

1. Finney, D.J. On the Distribution of a Variate Whose Logarithm Is Normally Distributed. Supplement to the Journal of the Royal Statistical Society 1941, 7, 155–161. doi:10.2307/2983663.
2. Wouters, O.Y.; Ploeger, D.T.; van Putten, S.M.; Bank, R.A. 3,4-Dihydroxy-L-Phenylalanine as a Novel Covalent Linker of Extracellular Matrix Proteins to Polyacrylamide Hydrogels with a Tunable Stiffness. Tissue Engineering Part C: Methods 2016, 22, 91–101. doi:10.1089/ten.tec.2015.0312.
3. Rajagopalan, P.; Marganski, W.A.; Brown, X.Q.; Wong, J.Y. Direct Comparison of the Spread Area, Contractility, and Migration of Balb/c 3T3 Fibroblasts Adhered to Fibronectin- and RGD-Modified Substrata. Biophysical Journal 2004, 87, 2818–2827. doi:10.1529/biophysj.103.037218.

## Figures

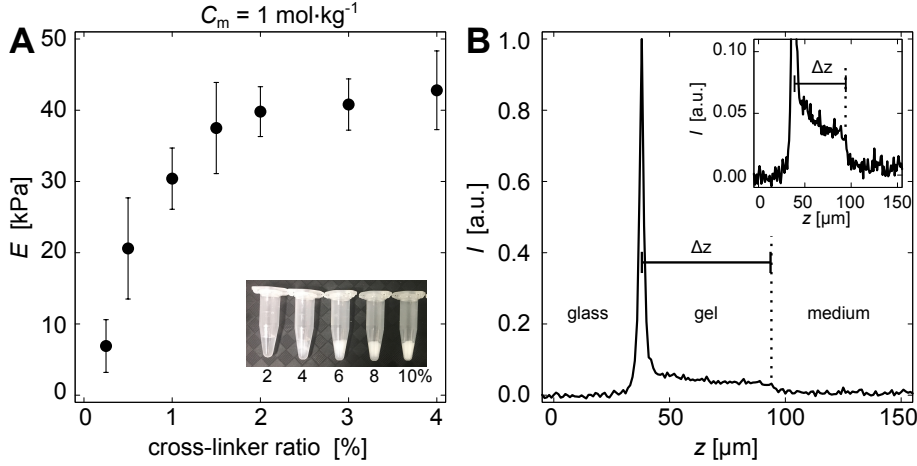

**Figure S1** Property assessment of the poly-acrylamide hydrogels. **A** Mechanical property assessment of the poly-acrylamide hydrogels by the variation of the cross-linker ratio with a fixed total monomer concentration  $C_m = 1 \text{ mol}\cdot\text{kg}^{-1}$ . The inset depicts an image of poly-acrylamide hydrogels with different cross-linker ratios. Cross-linker ratios of 4% and higher lead to non-transparent hydrogels. **B** illustrates an example of the auto-fluorescence signal without a second peak (gel to medium) of a hydrogel with  $C_m = 1.0 \text{ mol}\cdot\text{kg}^{-1}$  ( $E = 12 \text{ kPa}$ ). The inset shows the shallow plateau that was used to estimate the gel height.

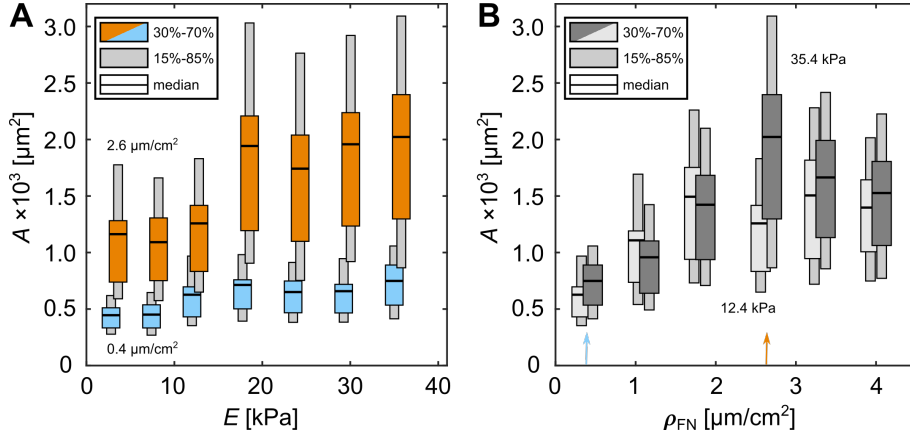

**Figure S2** Cell area dependence on functionalized rigid hydrogels. **A** Projected cell areas,  $\langle A \rangle$  as a function of  $E$  for  $\rho_{\text{FN}} \simeq 0.4 \text{ }\mu\text{g}/\text{cm}^2$  (blue) and  $\rho_{\text{FN}} \simeq 2.6 \text{ }\mu\text{g}/\text{cm}^2$  (orange). **B**  $\langle A \rangle$  as a function of  $\rho_{\text{FN}}$  at  $E \simeq 12.4 \text{ kPa}$  (bright grey) and  $E \simeq 35.4 \text{ kPa}$  (dark grey). Shown are the median and percentiles of the cell area distributions (see Fig. 3D-E, main manuscript).
